# Supplementary material for: Through the Looking Glass: Technological Characterization of Roman Glasses Mimicking Precious Stones from the Gorga Collection (Museo Nazionale Romano—Palazzo Altemps)
Source: MDPI journal article supplement (doi:10.3390/min13111421), 2023-11-08
Supplement: s1 [file s1]

Table S1: Measured values by EMP and known values of Corning B [38].

| Corning B                      |                   |                |
|--------------------------------|-------------------|----------------|
|                                | Measured<br>(wt%) | Known<br>(wt%) |
| SiO <sub>2</sub>               | 61.55             | 60.99          |
| Na <sub>2</sub> O              | 17.00             | 16.86          |
| CaO                            | 8.56              | 9.28           |
| Al <sub>2</sub> O <sub>3</sub> | 4.36              | 4.26           |
| K <sub>2</sub> O               | 1.00              | 0.71           |
| MgO                            | 1.03              | 1.14           |
| Fe <sub>2</sub> O <sub>3</sub> | 0.34              | 0.35           |
| TiO <sub>2</sub>               | 0.09              | 0.11           |
| P <sub>2</sub> O <sub>5</sub>  | 0.82              | 0.90           |
| SO <sub>3</sub>                | 0.50              | 0.70           |
| Cl                             | 0.2               | 0.2            |
| Cr <sub>2</sub> O <sub>3</sub> | 0.005             | 0.006          |
| MnO                            | 0.25              | 0.27           |
| CoO                            | 0.05              | 0.04           |
| NiO                            | 0.10              | 0.17           |
| CuO                            | 2.66              | 3.01           |
| ZnO                            | 0.19              | 0.20           |
| SnO <sub>2</sub>               | 0.04              | 0.03           |
| Sb <sub>2</sub> O <sub>5</sub> | 0.46              | 0.55           |
| BaO                            | 0.12              | 0.10           |
| PbO                            | 0.61              | 0.66           |
