# Supplementary material for: Through the Looking Glass: Technological Characterization of Roman Glasses Mimicking Precious Stones from the Gorga Collection (Museo Nazionale Romano—Palazzo Altemps)
Source: MDPI journal article supplement (doi:10.3390/min13111421), 2023-11-08
Supplement: s1 [file s1]

Table S2: Average reduced compositions for each analytical sample as determined by EMP analyses. Cations are expressed in wt% of arbitrary oxides.

|                                   | colour          | Analytical sample | SiO <sub>2</sub> | Na <sub>2</sub> O | CaO   | Al <sub>2</sub> O <sub>3</sub> | K <sub>2</sub> O | MgO  | FeO  | TiO <sub>2</sub> | P <sub>2</sub> O <sub>5</sub> | SO <sub>3</sub> | Cl   | TOTAL |
|-----------------------------------|-----------------|-------------------|------------------|-------------------|-------|--------------------------------|------------------|------|------|------------------|-------------------------------|-----------------|------|-------|
| <i>Porfido verde antico</i> (PV1) | Green           | PV1-tr            | 62.86            | 14.99             | 12.02 | 2.18                           | 1.83             | 2.23 | 1.14 | 0.15             | 0.82                          | 0.40            | 1.39 | 100   |
|                                   | Light green     | PV1-op            | 64.94            | 15.69             | 10.48 | 2.13                           | 1.25             | 1.94 | 1.01 | 0.14             | 0.58                          | 0.39            | 1.45 | 100   |
| <i>Porfido verde antico</i> (PV2) | Green-turquoise | PV2-tr            | 65.25            | 18.25             | 8.62  | 2.67                           | 0.35             | 1.24 | 1.03 | 0.18             | 0.15                          | 0.43            | 1.84 | 100   |
|                                   | Greenish yellow | PV2-op            | 65.66            | 17.75             | 7.46  | 2.39                           | 1.30             | 1.72 | 1.16 | 0.16             | 0.21                          | 0.40            | 1.79 | 100   |
| <i>Cipollino rosso</i> (CR)       | Red             | CR.op(r)          | 62.41            | 14.93             | 10.63 | 2.59                           | 1.59             | 2.97 | 2.04 | 0.22             | 0.93                          | 0.29            | 1.40 | 100   |
|                                   | White           | CR.op(w)          | 69.13            | 16.24             | 6.66  | 1.98                           | 0.25             | 3.33 | 0.39 | 0.07             | 0.01                          | 0.45            | 1.48 | 100   |
| <i>Rosso antico</i> (R)           | Colourless      | R-tr              | 66.00            | 11.98             | 10.47 | 2.31                           | 2.48             | 2.98 | 1.62 | 0.18             | 0.80                          | 0.24            | 0.95 | 100   |
|                                   | Red             | R-op              | 65.17            | 12.77             | 10.14 | 2.42                           | 2.28             | 2.72 | 1.96 | 0.19             | 0.74                          | 0.23            | 1.37 | 100   |
| <i>Giallo antico</i> (G)          | Yellow          | G-op              | 67.60            | 16.93             | 8.91  | 2.32                           | 0.37             | 0.91 | 0.84 | 0.12             | 0.06                          | 0.41            | 1.53 | 100   |
| <i>Diaspro nero e giallo</i> (D)  | Brown           | D-tr              | 64.06            | 17.43             | 10.65 | 2.85                           | 0.59             | 1.18 | 1.11 | 0.20             | 0.11                          | 0.42            | 1.40 | 100   |
|                                   | Yellow          | D-op              | 70.23            | 15.88             | 6.94  | 2.55                           | 0.35             | 0.73 | 1.01 | 0.18             | 0.04                          | 0.46            | 1.63 | 100   |
| <i>Semesanto</i> (S)              | Purple          | S-tr              | 68.07            | 17.19             | 8.52  | 2.49                           | 0.58             | 0.73 | 0.56 | 0.07             | 0.14                          | 0.35            | 1.31 | 100   |
|                                   | White           | S-op              | 72.12            | 14.53             | 6.80  | 2.83                           | 0.62             | 0.58 | 0.55 | 0.07             | 0.07                          | 0.93            | 0.90 | 100   |
| <i>Agate/alabaster</i> (A1)       | Brown           | A1-tr(b)          | 67.95            | 16.83             | 9.26  | 2.68                           | 0.54             | 0.67 | 0.35 | 0.06             | 0.12                          | 0.38            | 1.17 | 100   |
|                                   | Colourless      | A1-tr(c)          | 67.29            | 17.91             | 8.95  | 2.33                           | 0.42             | 0.59 | 0.28 | 0.05             | 0.08                          | 0.31            | 1.77 | 100   |
|                                   | White           | A1-op             | 69.83            | 15.00             | 9.20  | 2.63                           | 0.61             | 0.68 | 0.42 | 0.06             | 0.14                          | 0.79            | 0.64 | 100   |
| <i>Agate/alabaster</i> (A2)       | Amber           | A2-tr             | 66.04            | 17.66             | 10.10 | 2.71                           | 0.47             | 0.65 | 0.40 | 0.06             | 0.22                          | 0.30            | 1.39 | 100   |
|                                   | White           | A2-op             | 67.91            | 15.81             | 9.89  | 2.71                           | 0.52             | 0.78 | 0.65 | 0.08             | 0.14                          | 0.83            | 0.68 | 100   |
