# Supplementary material for: Through the Looking Glass: Technological Characterization of Roman Glasses Mimicking Precious Stones from the Gorga Collection (Museo Nazionale Romano—Palazzo Altemps)
Source: MDPI journal article supplement (doi:10.3390/min13111421), 2023-11-08
Supplement: s1 [file s1]

Archive with 9 entries (9 files):
- Captions supplementary materials.pdf
- FigureS1.jpg
- FigureS2.jpg
- FigureS3.jpg
- FigureS4.jpg
- FigureS5.jpg
- FigureS6.jpg
- TableS1.pdf
- TableS2.pdf
