# Supplementary figures and images for: Through the Looking Glass: Technological Characterization of Roman Glasses Mimicking Precious Stones from the Gorga Collection (Museo Nazionale Romano—Palazzo Altemps)
Source: MDPI journal article supplement (doi:10.3390/min13111421), 2023-11-08

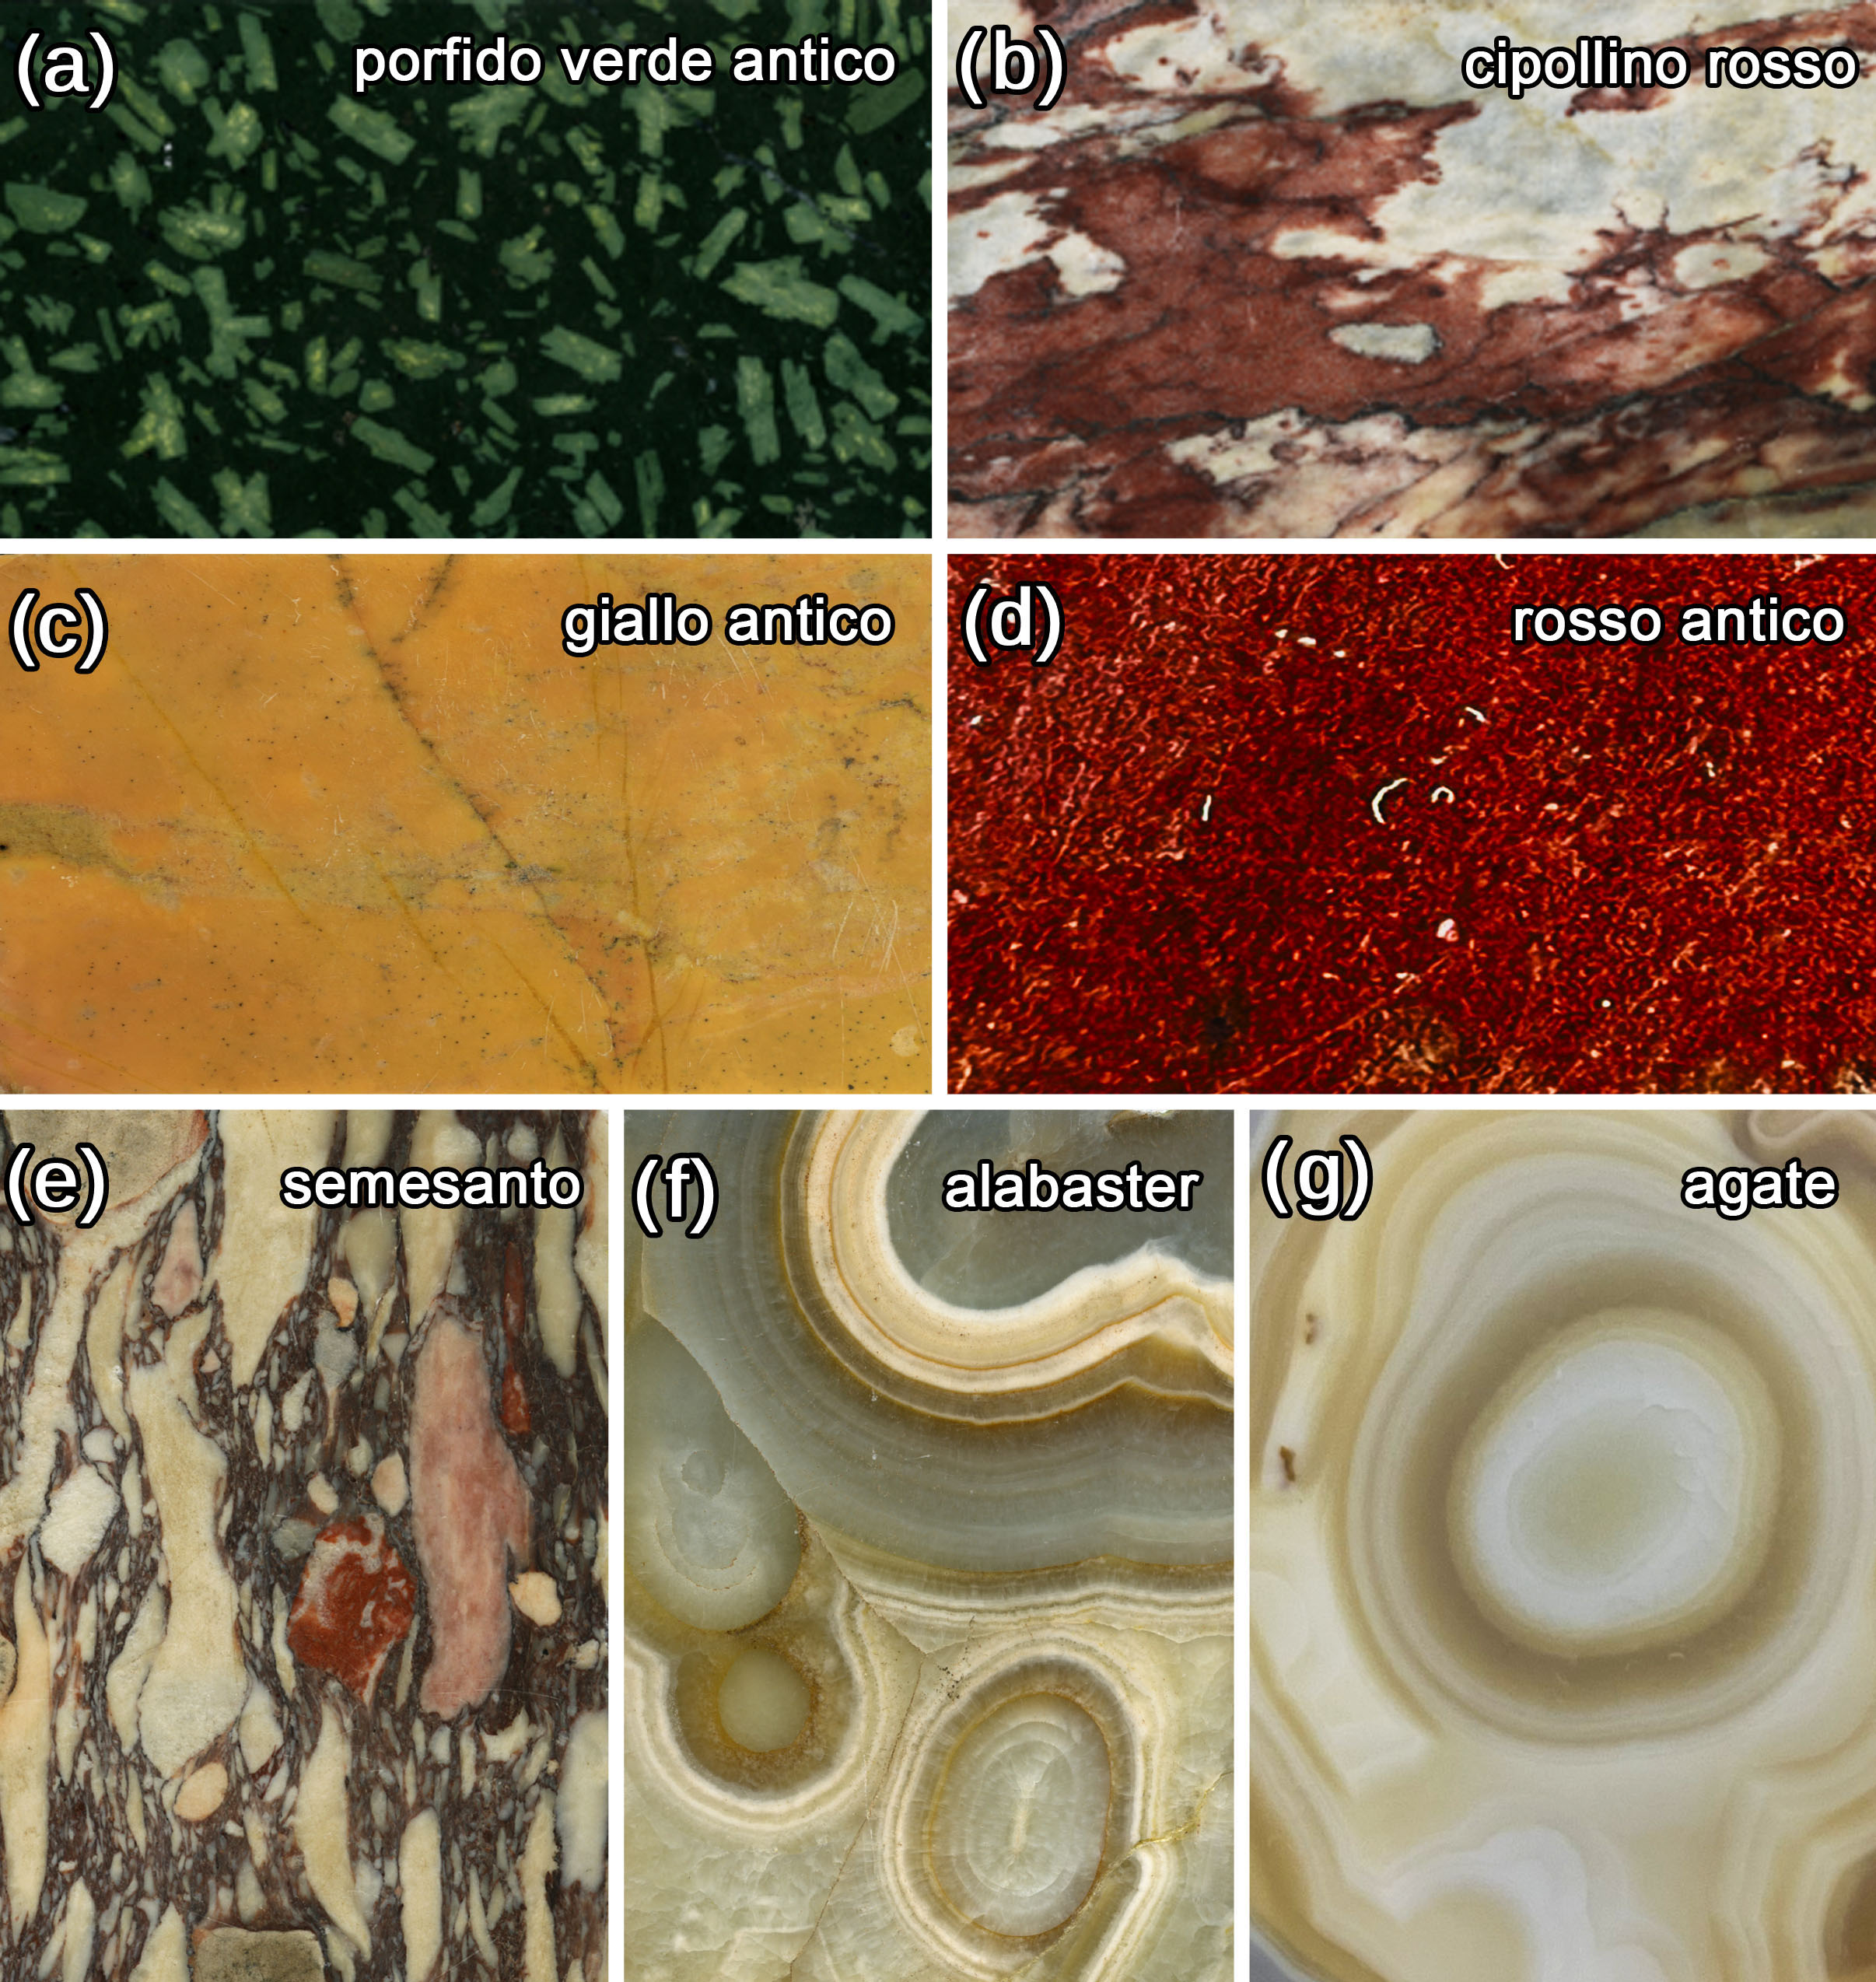

Supplement: s1 [file s1 › FigureS1.jpg]

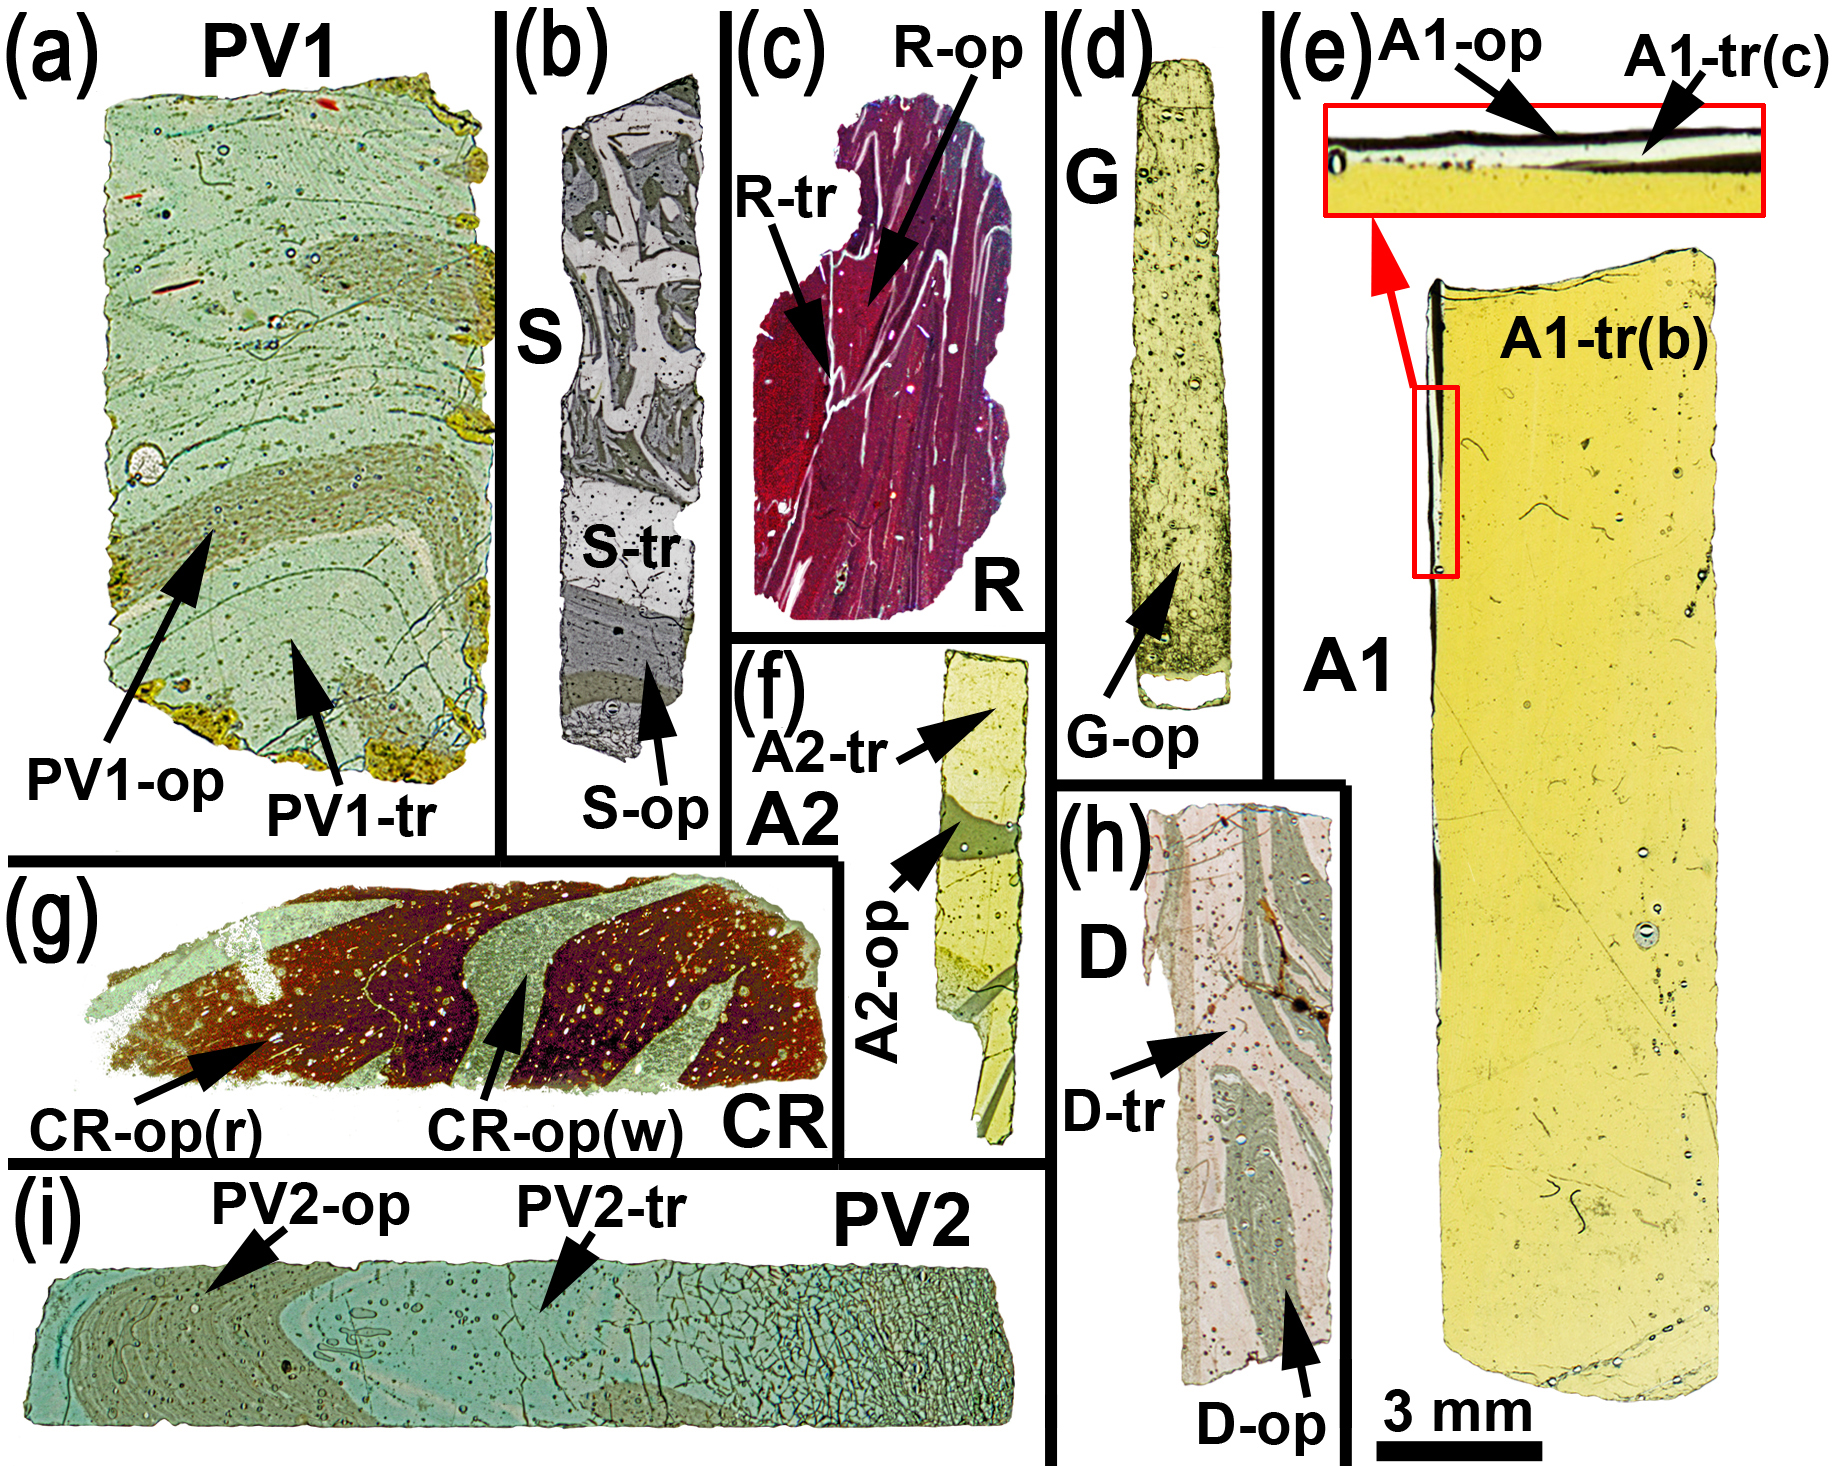

Supplement: s1 [file s1 › FigureS2.jpg]

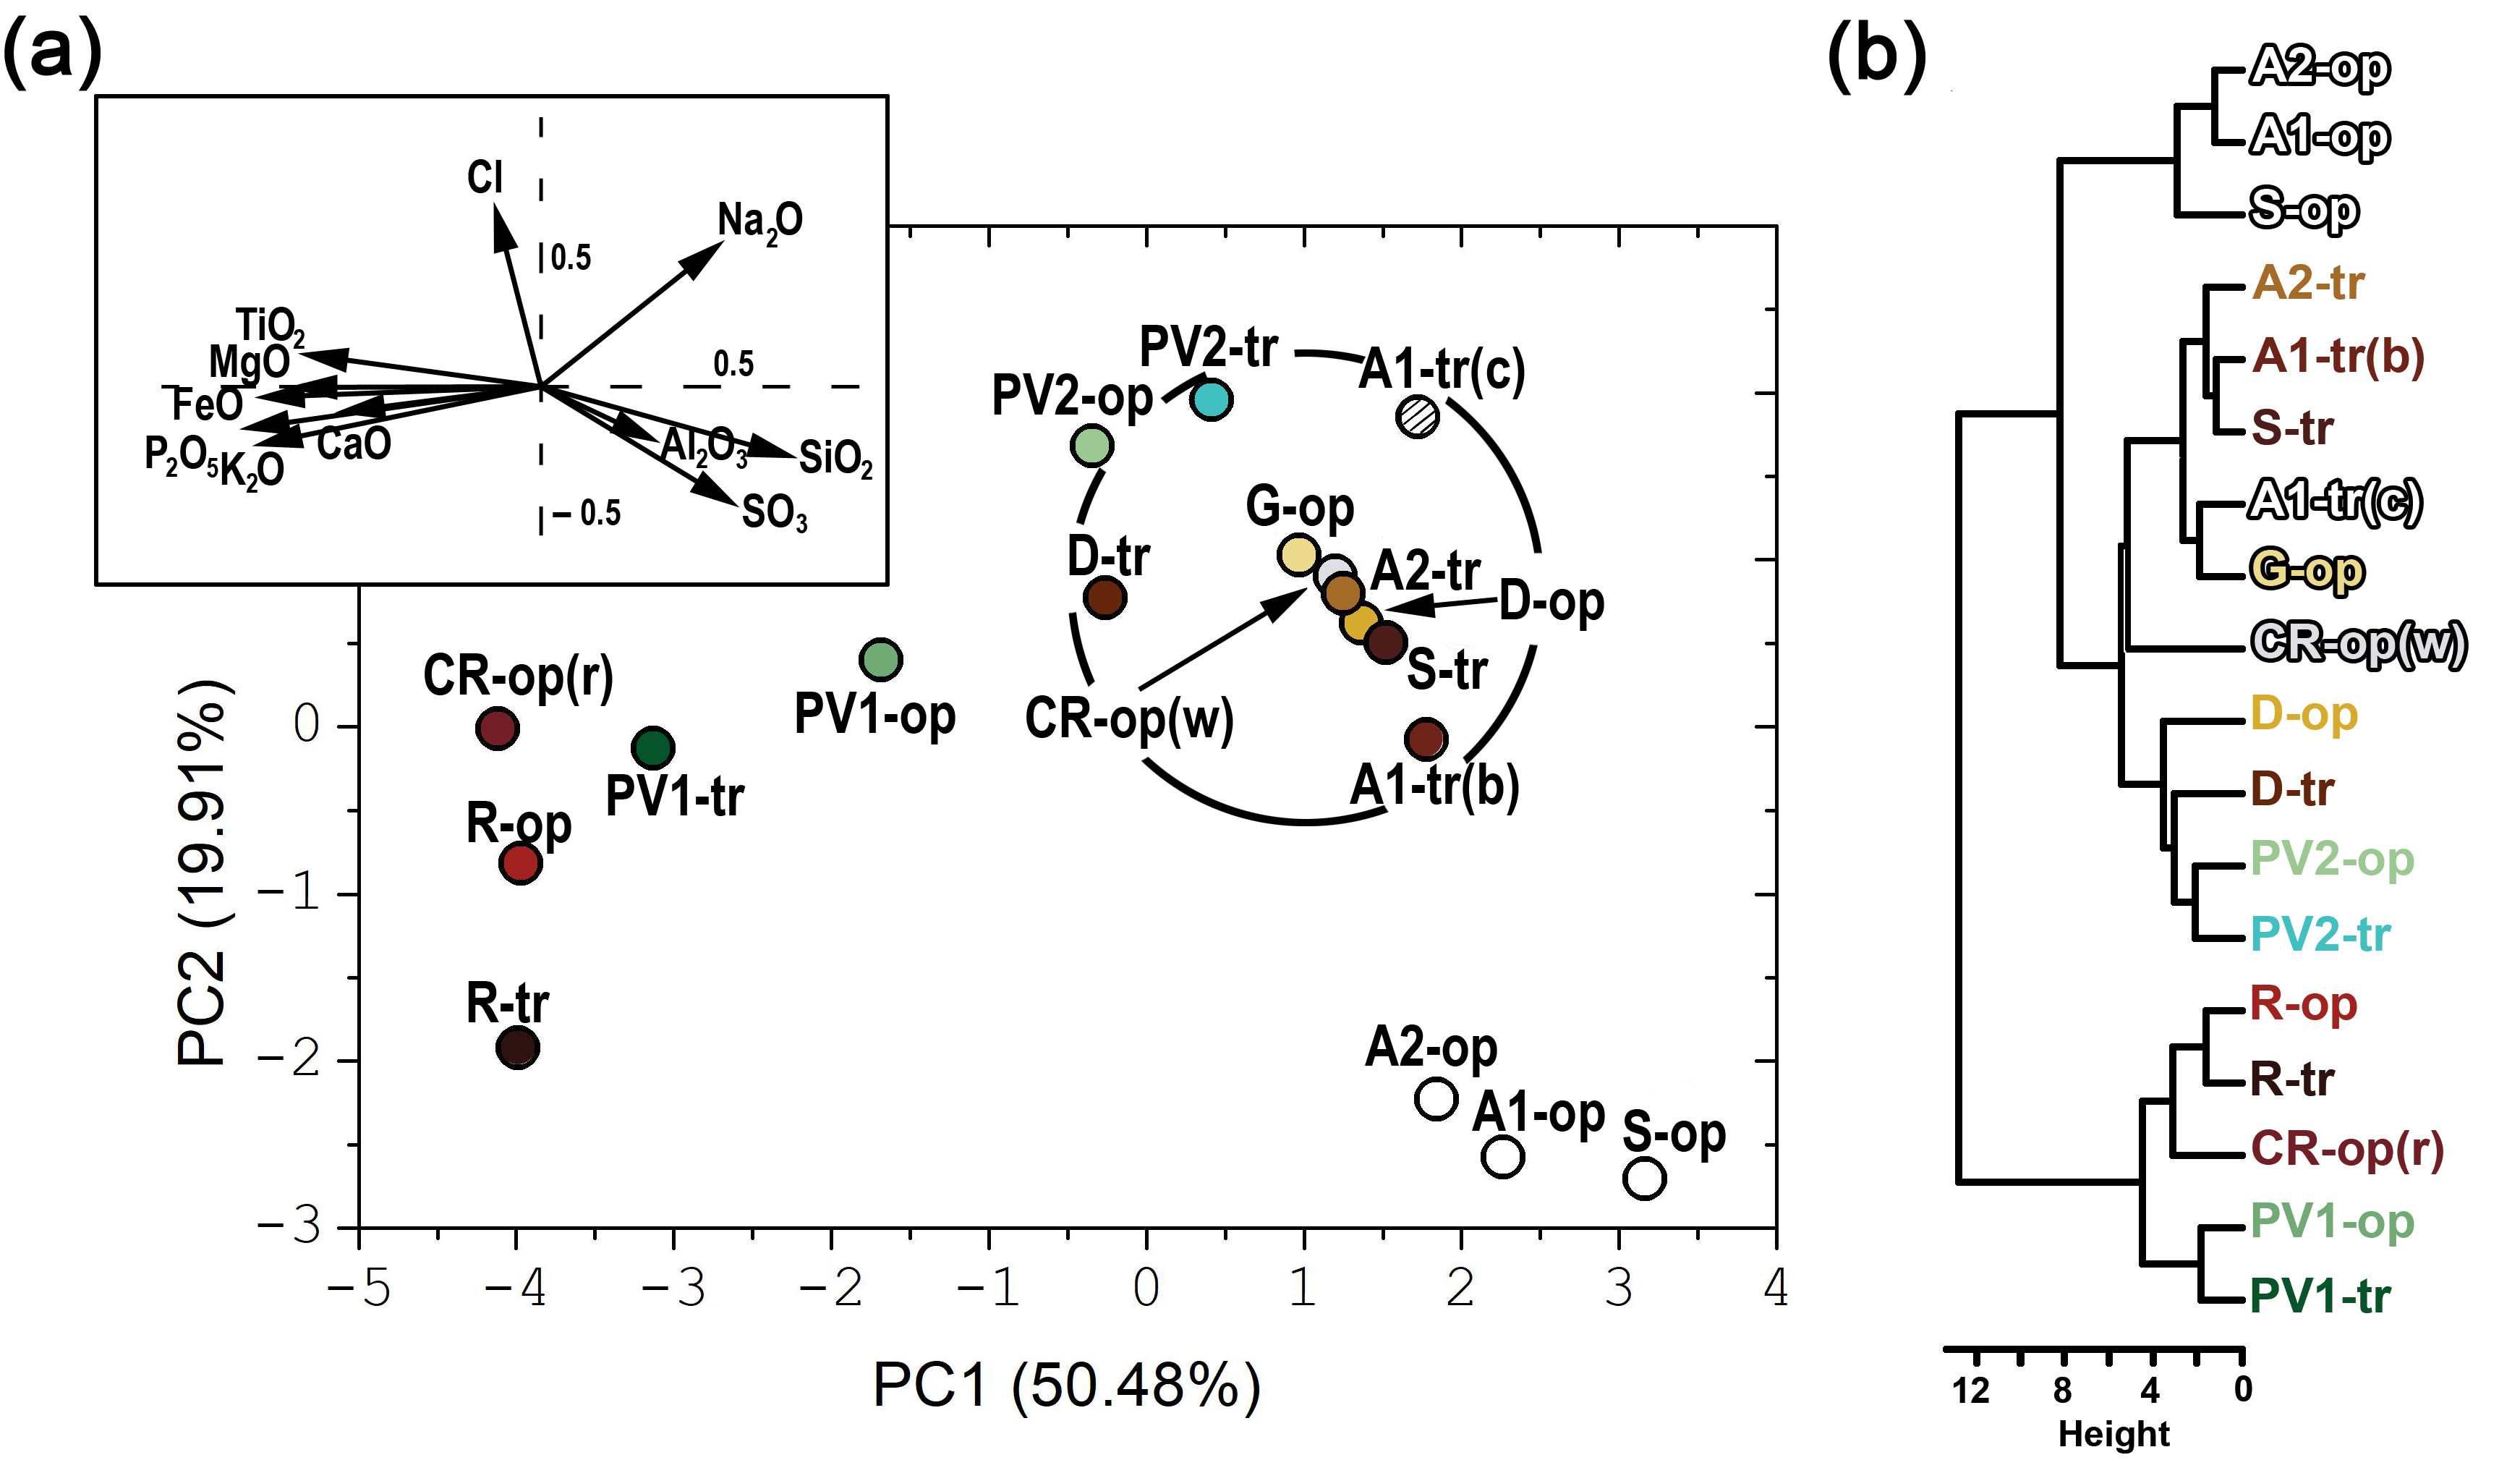

Supplement: s1 [file s1 › FigureS3.jpg]

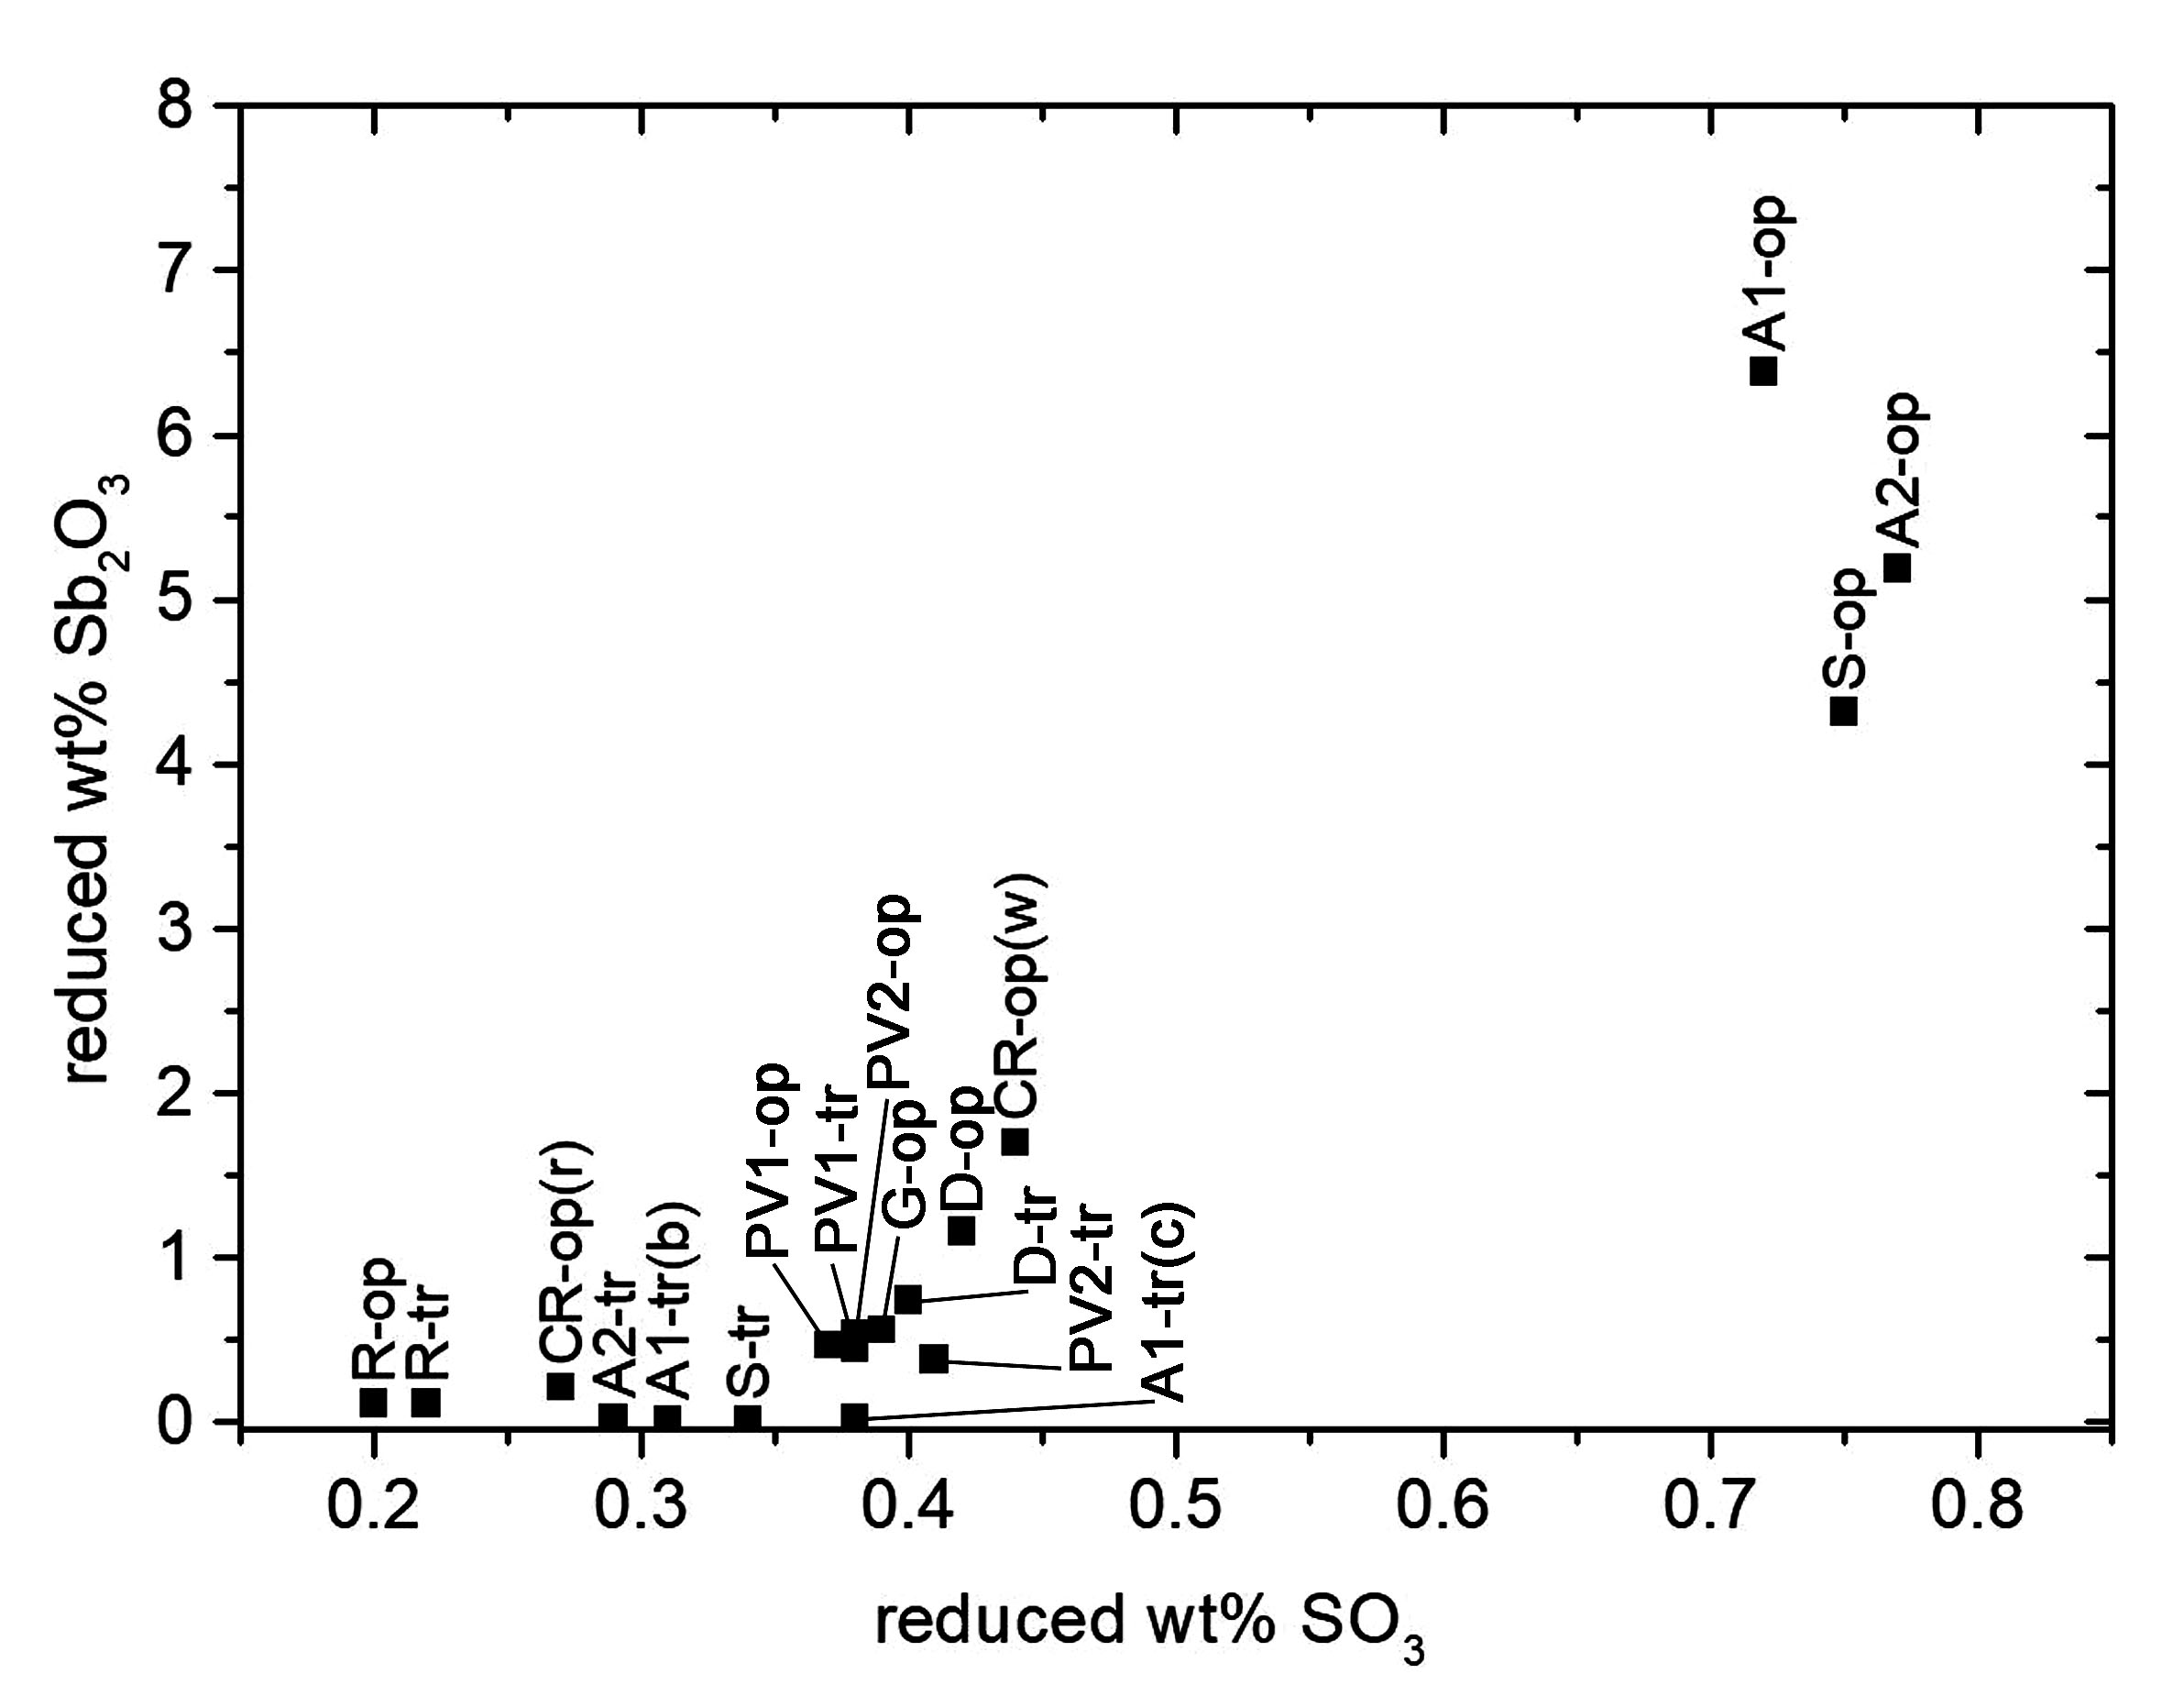

Supplement: s1 [file s1 › FigureS4.jpg]

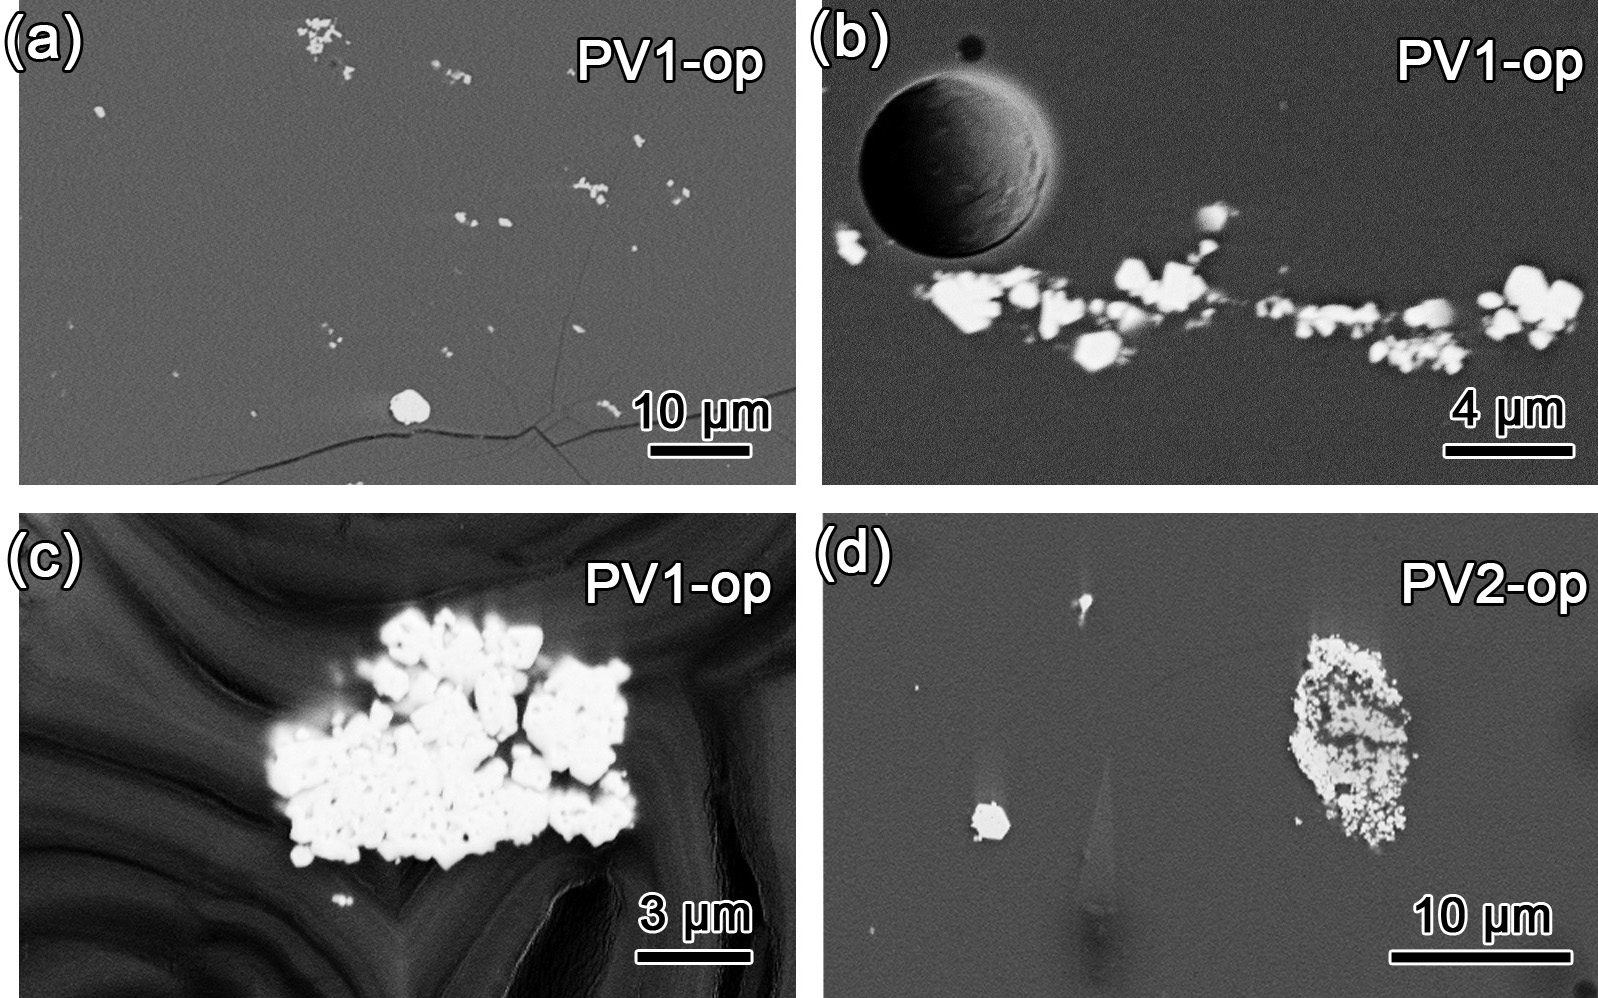

Supplement: s1 [file s1 › FigureS5.jpg]

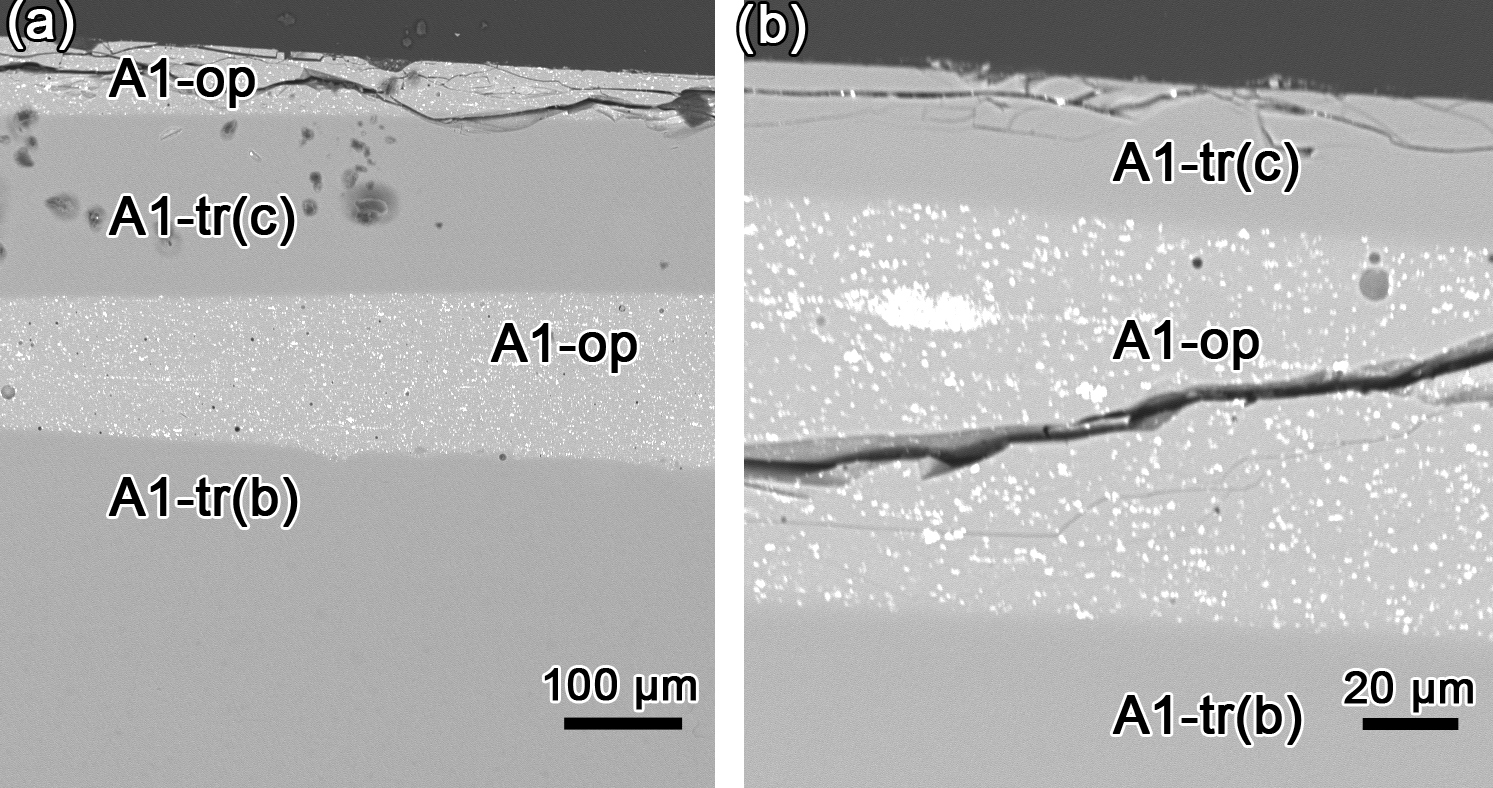

Supplement: s1 [file s1 › FigureS6.jpg]
